# Supplementary material for: Time-resolved EPR investigation of intramolecular photoinduced electron transfer in spin-labeled fullerene/ferrocene dyads
Source: Royal Society of Chemistry journal article supplement (doi:10.1039/b104482f), 2001-01-01
Supplement: additional_text.doc [file additional_text.doc]

**SUPPORTING INFORMATION**

**Instrumentation.** Details regarding instrumentation used for products characterization and analysis have been described elsewhere1. Reaction yields were not optimized and refer to pure, isolated products. The purity of all derivatives described in this session was checked by GC-MS and elemental analysis.

**Materials.** *t*-Butylbromoacetate, benzylbromoacetate, 2-aminoethanol, 2-(2’-aminoethoxy)ethanol, benzylchloroformiate, di-*t*-butyldicarbonate and ferrocene carboxylic were used as purchased from Fluka and Aldrich. All solvents were distilled prior to use.

**Abbreviation used**. Fc: ferrocene, DCC: dicyclohexylcarbodiimide, DMAP: 4-dimethylaminopyridine, TEA: triethylamine.

*
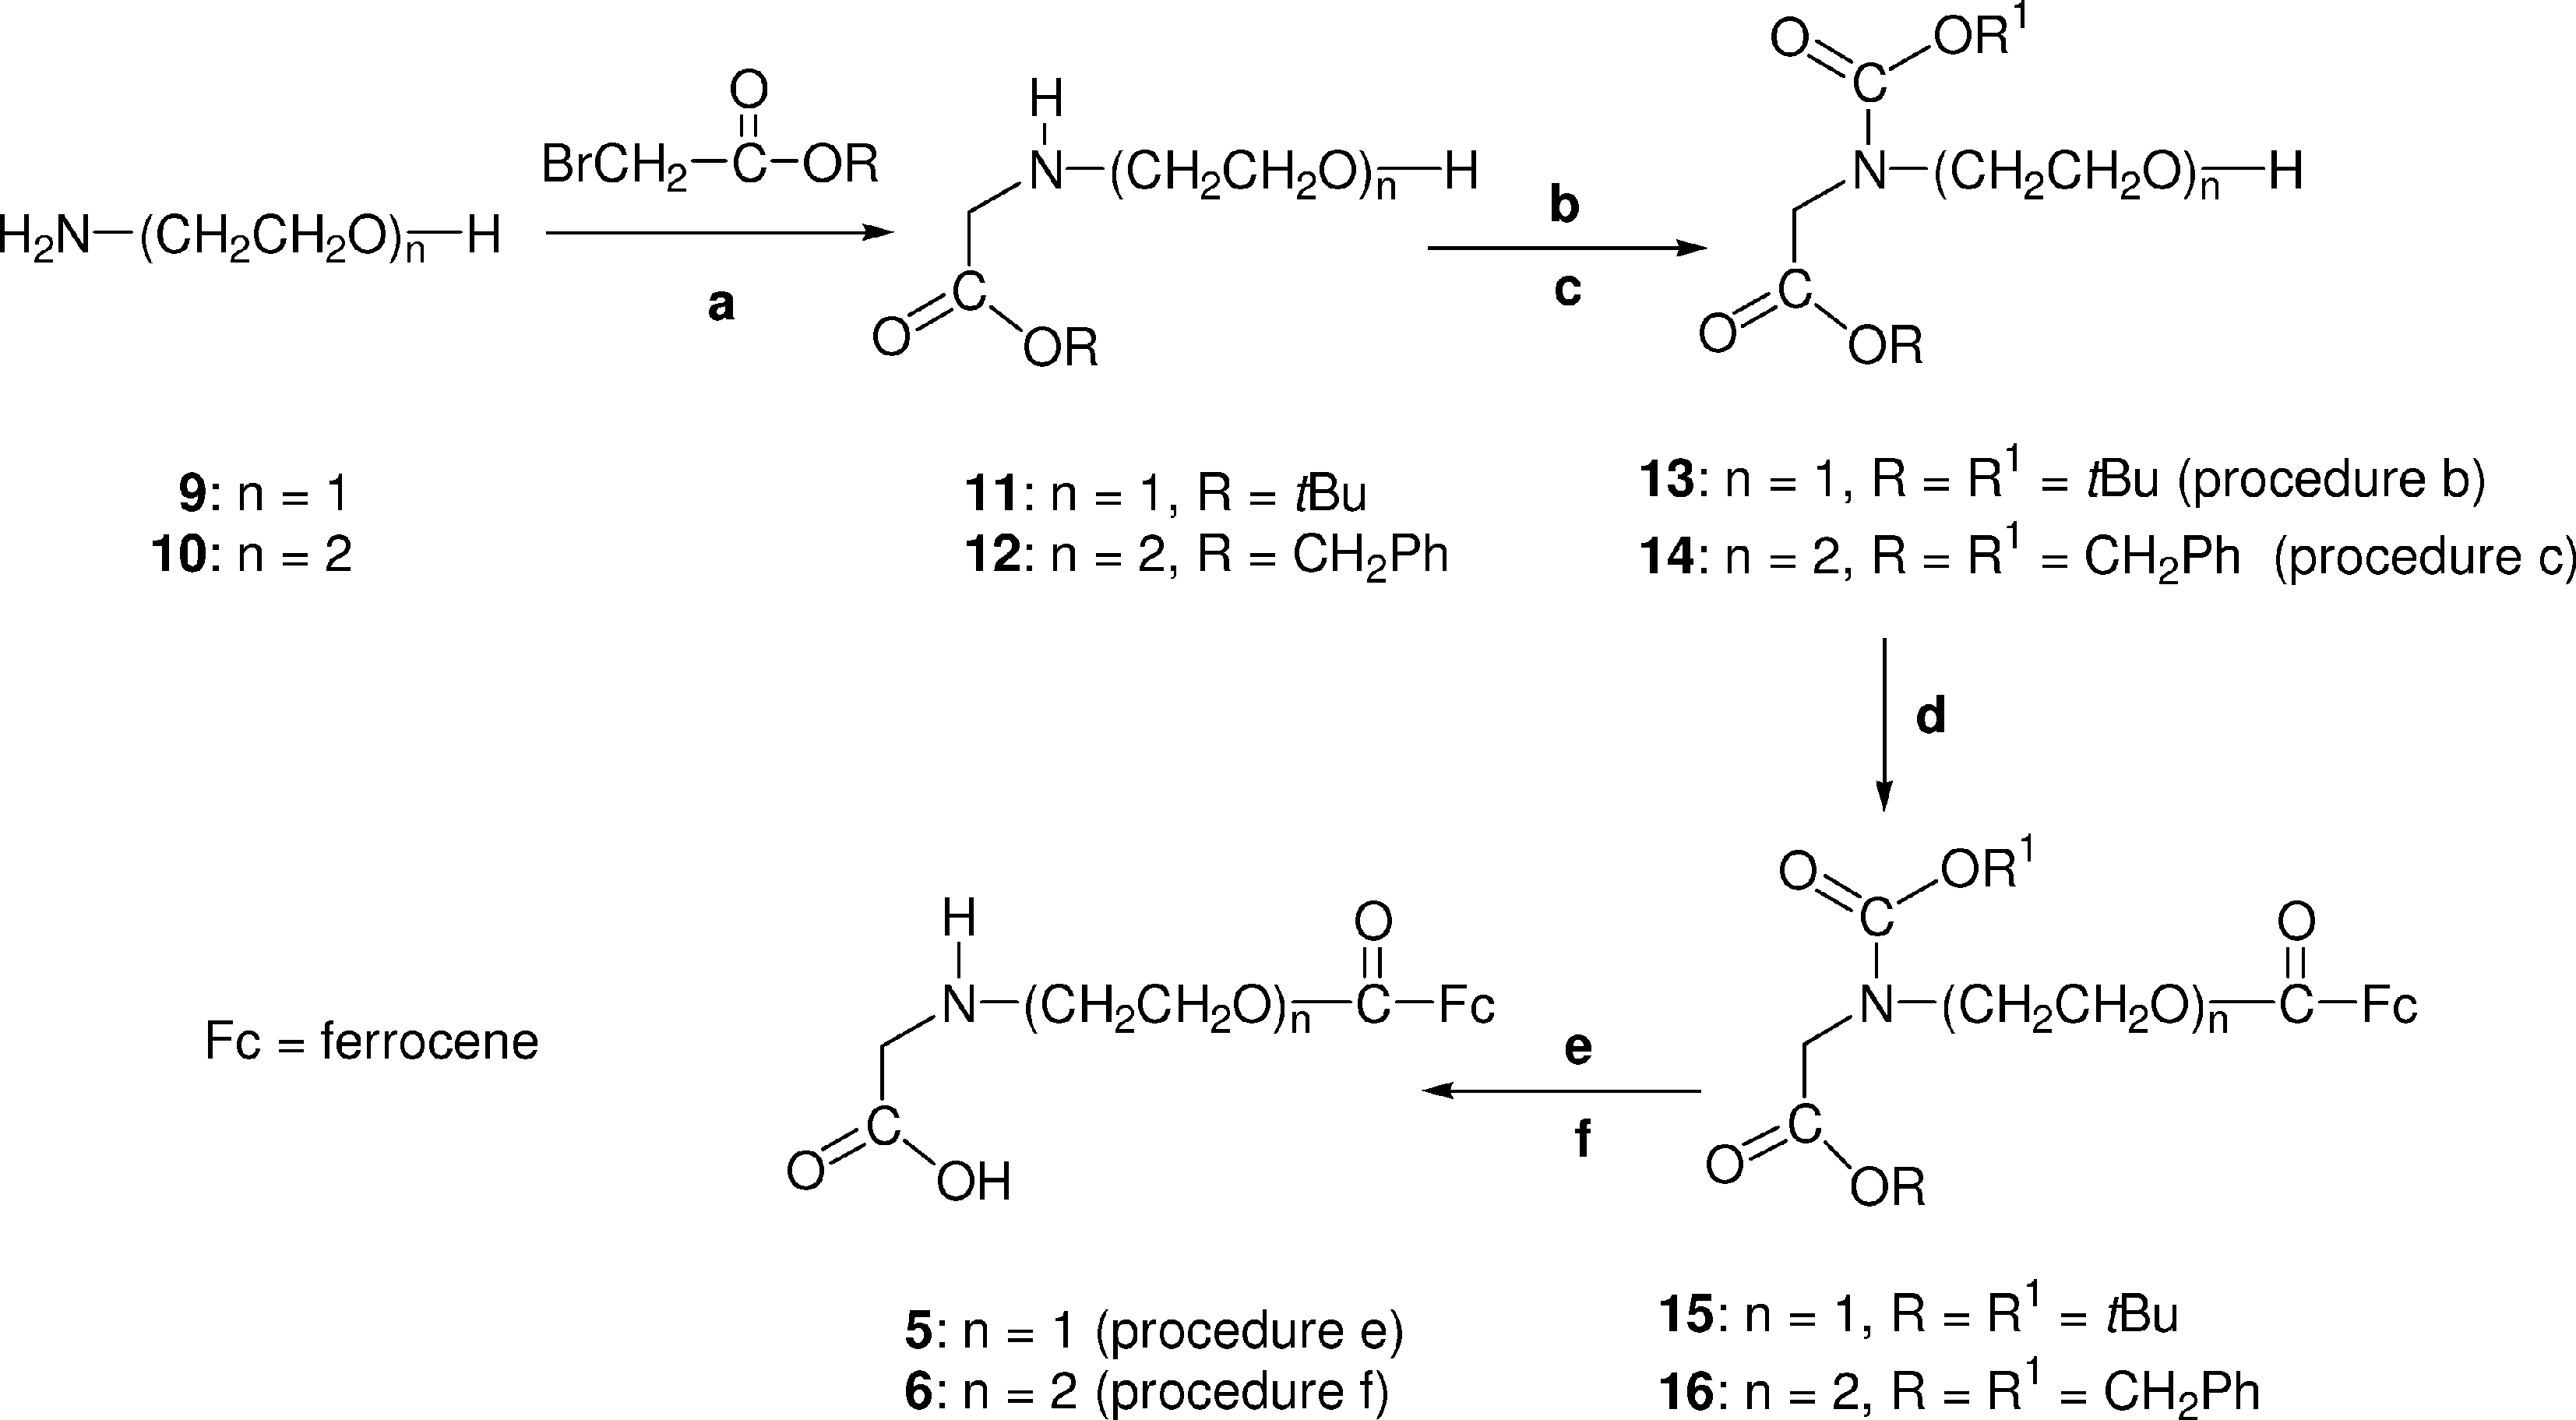
*

**General procedure for the synthesis of glycines 11 and 12**. To a solution of aminoalcohol **9** or **10** and TEA in dry CH2Cl2 at 0 °C, alkylbromoacetate (*t*-butyl- or benzylbromoacetate) was added over a period of 30 min, then the solution was brought to ambient temperature and stirred for 14 h The mixture was concentrated at reduced pressure and the product purified by flash chromatography (SiO2) using ethylacetate/ethanol/30% aq. NH3 85:10:5 as eluent.

**N-(2-hydroxyethyl)glycine *t*-butylester 11.** Starting materials: 2-aminoethanol **9** (2 g, 33 mmol), TEA (5.5. ml, 40 mmol); CH2Cl2: 100 ml (14 h). TLC (eluant: ethyl acetate, Rf = 0.2); 2.25 g (clear oil, 39%). 1H NMR (250 MHz, CDCl3)  (ppm) 1.45 (s, 9H), 2.76 (t, 2H), 3.29 (s, 2H), 3.59 (t, 2H); 13C NMR (62.9 MHz, CDCl3)  (ppm) 28.0, 51.0, 51.1, 60.9, 81.4, 172.0. IR (KBr) 1735, 1369, 1233, 1159 cm-1; GC-MS (MW = 175) *m/z*: (%) 41 (25), 56 (32), 74 (100), 88 (21), 101 (4), 157 (2). Anal. Calcd. for C8H17NO3: C, 54.8; H, 9.8; N, 8.0. Found: C, 53.2; H, 9.5; N, 8.2.

**N-[(ethyleneoxy)-2-hydroxyethyl]glycine benzylester 12.** Starting materials: 2-(2’-aminoethoxy)ethanol **10** (2.94 g, 33 mmol), TEA (5.5. ml, 40 mmol); CH2Cl2: 100 ml (16 h). TLC (eluant: ethyl acetate, Rf = 0.3); 3.75 g (clear oil, 45%). 1H NMR (250 MHz, CDCl3)  (ppm) 2.81 (t, J = 5 Hz, 2H), 3.48 (s, 2H),3.54-3.63 (m, 4H), 3.69-3.73 (m, 4H), 5.16 (s, 2H), 7.34-7.36 (m, 5H); 13C NMR (62.9 MHz, CDCl3)  (ppm) 48.8, 50.7, 61.8, 66.6, 70.4, 72.3, 126.9, 128.4, 128.6, 172.3. IR (KBr) 1741, 1667, 1455, 1192, 1124, 741, 700 cm-1; GC-MS (MW = 253) *m/z*: (%) 56 (18), 58 (15), 91 (100), 100 (9), 118 (40), 178 (25), 233 (1). Anal. Calcd. for C13H19NO4: C, 61.6; H, 7.6; N, 5.5. Found: C, 60.2; H, 7.4; N, 4.8.

**N-(2-hydroxyethyl)-N-(*t*-butoxycarbonyl)glycine *t*-butylester 13**. To a solution of glycine **11** (1.5 g, 8.5 mmol) in 5 ml of dioxane, sodium acetate (0.8 g, 10 mmol) in 3 ml of water was added. The solution was cooled on an ice-bath and di-*t*-butyldicarbonate in 25 ml of dioxane was added over a period of 30 min, then the mixture was brought to ambient temperature and stirred overnight. After removing dioxane at reduced pressure, water was added and the mixture extracted with ethyl acetate. The organic layer, dried over Na2SO4, was concentrated at reduced pressure, loaded on top of a SiO2 column and purified by flash chromatography (ethyl acetate) affording 1.09 g (46%) of **13** as a clear oil. 1H NMR (250 MHz, CDCl3)  (ppm) 1.39 (s, 9H), 1.44 (s, 9H), 3.37 (m, 2H), 3.66 (m, 2H), 3.80 (d, 2H); 13C NMR (62.9 MHz, CDCl3)  (ppm) 27.9, 28.1, 28.2, 51.3, 51.8, 52.4, 52.5, 60.9, 61.0, 80.4, 82.2, 82.3, 155.5, 171.0, 171.3. IR (KBr) 1746, 1703, 1368, 1250, 1157 cm-1; GC-MS (MW = 275) *m/z*: (%) 41 (36), 57 (100), 74 (58), 88 (19), 118 (6), 146 (11), 174 (4), 257 (1). Anal. Calcd. for C13H25NO5: C, 56.7; H, 9.2; N, 5.1. Found: C, 57.4; H, 9.2; N, 5.1.

**N-[(ethyleneoxy)-2-hydroxyethyl]-N-(benzyloxycarbonyl)glycine benzylester 14**. To a solution of glycine **12** (2.5 g, 10 mmol) and TEA (1.8 ml, 13 mmol) in 50 ml of dry CH2Cl2, benzylchloroformiate (1.25 ml, 9 mmol), in 15 ml of dry CH2Cl2, was added over a period of 30 min. at 0 °C. The mixture was then brought to ambient temperature and stirred for 15 h. After concentration at reduced pressure, the crude mixture was loaded on top of a SiO2 column and purified by flash chromatography (ethyl acetate) affording 1.97 g (51%) of **14** as a clear oil. 1H NMR (250 MHz, CDCl3)  (ppm) 3.30-3.47 (m, 2H), 3.50-3.65 (m, 6H), 4.14 (d, 2H), 5.10 (d, 2H), 5.17 (s, 2H), 7.25-7.37 (m, 10H); 13C NMR (62.9 MHz, CDCl3)  (ppm) 48.2, 48.7, 50.2, 50.4, 61.4, 66.7, 66.8, 67.4, 67.5, 69.9, 70.1, 72.3, 127.6, 127.7, 127.9, 128.0, 128.2, 128.3, 128.4, 128.5, 155.9, 169.8, 169.9. IR (KBr) 1749, 1705, 1456, 1189, 1137, 739, 699 cm-1; GC-MS (MW = 387) *m/z*: (%) 65 (8), 91 (100), 118 (2), 146 (3), 190 (5), 234 (4), 268 (5), 300 (1), 325 (1). Anal. Calcd. for C21H25NO6: C, 65.1; H, 6.5; N, 3.6. Found: C, 64.0; H, 6.4; N, 3.7.

**General procedure for the synthesis of glycines 15 and 16**. A suspension of ferrocene carboxylic acid, DMAP and DCC in CH2Cl2 was stirred at room temperature for 20 min. Glycine **13**, or **14**, in CH2Cl2 was then added and the mixture was stirred at ambient temperature overnight. After concentration at reduced pressure, the product was purified by flash column chromatography (SiO2) (toluene/ethyl acetate mixtures) affording the title glycine as a red oil.

**N-(2-ferrocenecarbonyloxyethyl)-N-(*t*-butyloxycarbonyl)glycine *t*-butylester 15**. Starting materials: ferrocene carboxylic acid (168 mg, 0.73 mmol), DCC (156 mg, 0.75 mmol), DMAP (44 mg, 0.36 mmol), CH2Cl2: 3ml. Glycine **13** (200 mg, 0.73 mmol) dissolved in 2 ml of CH2Cl2. TLC (eluant: toluene/ethyl acetate 8:2, Rf = 0.6); flash chromatography: toluene/ethyl acetate 9:1; 223 mg (red oil, 65%). 1H NMR (250 MHz, CDCl3)  (ppm) 1.46 (s, 18H), 3.62 (m, 4H), 3.89 (s, 1H), 4.0 (s, 1H), 4.21 (s, 5H), 4.32 (s, 2H), 4.80 (s, 2H); 13C NMR (62.9 MHz, CDCl3)  (ppm) 28.1, 28.2, 28.3, 30.9, 47.3, 47.4, 50.5, 51.1, 62.8, 69.8, 69.9, 70.2, 70.3, 70.8, 71.0, 71.5, 80.4, 80.5, 81.6, 81.7, 156.0, 169.1, 171.5. IR (KBr) 1746, 1710, 1460, 1368, 1276, 1140 cm-1. Anal. Calcd. for C24H33NO6Fe: C, 59.2; H, 6.8; N, 2.9. Found: C, 59.4; H, 6.8; N, 3.3.

**N-[(ethyleneoxy)-2-ferrocenecarbonyloxyethyl]-N-(benzyloxycarbonyl)glycine benzylester 16**. Starting materials: ferrocene carboxylic acid (140 mg, 0.60 mmol), DCC (138 mg, 0.66 mmol), DMAP (40 mg, 0.30 mmol), CH2Cl2: 3ml. Glycine **14** (220 mg, 0.73 mmol) dissolved in 2 ml of CH2Cl2. TLC (eluant: toluene/ethyl acetate 8:2, Rf = 0.6); flash chromatography: toluene/ethyl acetate 9:1; 218 mg (red oil, 64%). 1H NMR (250 MHz, CDCl3)  (ppm) 3.62 (m, 6H), 4.07-4.33 (m, 9H), 4.37 (s, 2H), 4.80 (s, 2H), 5.12 (d, 4H), 7.25-7.34 (m, 10H); 13C NMR (62.9 MHz, CDCl3)  (ppm) 48.0, 48.6, 50.3, 63.0, 63.1, 66.7, 66.8, 67.4, 67.6, 69.2, 69.9, 70.3, 70.5, 70.9, 71.5, 127.7, 127.8, 127.9, 128.0, 128.2, 128.4, 128.5, 155.9, 169.7, 171.6. IR (KBr) 1750, 1710, 1461, 1275, 1136 cm-1. Anal. Calcd. for C32H33NO7Fe: C, 64.1; H, 5.6; N, 2.3. Found: C, 63.5; H, 5.6; N, 2.3.

**N-(2-ferrocenecarbonyloxyethyl)-N-(*t*-butyloxycarbonyl)glycine 5**. To a solution of glycine **15** (552 mg, 1.1 mmol) in 13 ml of CH2Cl2, 1 ml of trifluoroacetic acid was added. The mixture was stirred at room temperature for 8 h then the solvents were removed in vacuo. The solid residue was treated with diethyl ether, filtered and dried in vacuo affording 435 mg (89%) of the title compound that was used for the preparation of fulleropyrrolidine **2** without further purification. Mp = 103-105 °C. 1H NMR (250 MHz, DMSO-d6)  (ppm) 3.98 (s, 2H), 4.25 (s, 5H), 4.39 (t, J = 5 Hz, 2H), 4.52 (t, J = 2 Hz, 2H), 4.85 (t, J = 2 Hz, 2H). IR (KBr) 1723, 1675, 1451, 1423, 1282, 1195, 1148, 831, 723 cm-1. Anal. Calcd. for C17H18NO6F3Fe: C, 45.9; H, 4.1; N, 3.2. Found: C, 45.1; H, 4.2; N, 3.2.

**N-[(ethyleneoxy)-2-ferrocenecarbonyloxyethyl]-N-(benzyloxycarbonyl)glycine 6**. To a solution of glycine **16** (840 mg, 1.4 mmol) in 50 ml of methanol, 50 mg of Pd/C catalyst were added. Hydrogen was bubbled for 5 h then the catalyst was filtere over a pad of celite and washed with methanol. The filtrate was concentrated at reduced pressure and the residue treated with diethyl ether, filtered and dried in vacuo affording 446 mg (85%) of the title compound that was used for the preparation of fulleropyrrolidine **3** without further purification. Mp = 168-170 °C. 1H NMR (250 MHz, DMSO-d6)  (ppm) 3.0 (t, J = 5.3 Hz, 2H), 3.18 (s, 2H), 3.69 (m, 4H), 4.23 (s, 5H), 4.29 (t, J = 4.4 Hz, 2H), 4.48 (t, J = 1.8 Hz, 2H), 4.76 (t, J = 1.8 Hz, 2H). IR (KBr) 1712, 1608, 1389, 1273, 1145, 1125 cm-1. Anal. Calcd. for C17H21NO5Fe: C, 54.4; H, 5.6; N, 3.7. Found: C, 53.5; H, 5.7; N, 3.6.

**References**

(1) A. Bianco, M. Maggini, G. Scorrano, C. Toniolo, G. Marconi, C. Villani and M. Prato, *J.* *Am. Chem. Soc.* 1996, 118, 4072.
